# Supplementary material for: A Mouse Model of Brittle Cornea Syndrome caused by mutation in Zfp469
Source: bioRxiv or medRxiv preprint supplement (doi:10.1101/2021.07.08.451591), 2021-07-09
Supplement: Supplementary file [file media-1.pdf]

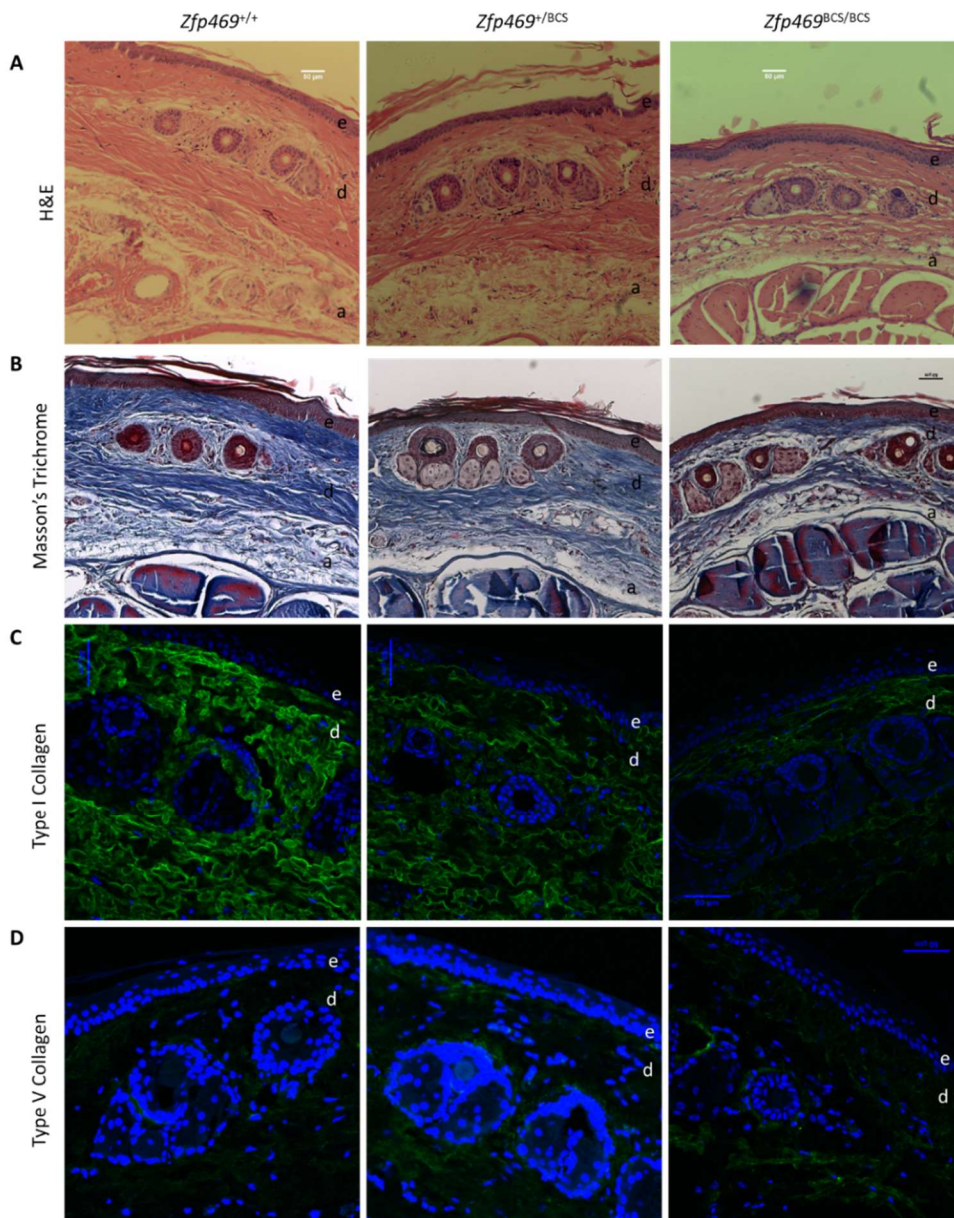

**Fig. S1. Decreased dermal thickness and type I collagen abundance in *Zfp469*<sup>BCS/BCS</sup> tail skin.** (A) Representative Hematoxylin and eosin (H&E) and (B) Masson's trichrome staining of sections of tail skin from *Zfp469*<sup>+/+</sup>, *Zfp469*<sup>+/BCS</sup> and *Zfp469*<sup>BCS/BCS</sup> littermate male mice at 6 months of age shows thinning of the dermis (d) and subcutaneous adipose (a) layer in homozygotes (n=3 for each genotype). The collagen enriched dermal matrix is stained blue by Masson's Trichrome stain, the epidermis (e) is stained red. Scale bars represent 50  $\mu$ m. (C) Representative immunofluorescence images of tail skin sections stained for type I collagen (green) and (D) type V collagen (green) show decreased type I collagen staining in the dermis (d) of *Zfp469*<sup>BCS/BCS</sup> tail sections, but type V collagen staining is similar to that observed in wildtype tail sections (n=3 for each genotype). Nuclei are stained with DAPI (blue). Scale bars represent 50  $\mu$ m.
