# Supplementary material for: A Mouse Model of Brittle Cornea Syndrome caused by mutation in Zfp469
Source: bioRxiv or medRxiv preprint supplement (doi:10.1101/2021.07.08.451591), 2021-07-09
Supplement: Supplementary file [file media-2.pdf]

**Table S1. CRISPR-Cas9n genome editing sgRNA and repair template sequences and primers used for in vitro transcription.** Guide RNA sequences shown in bold were used in CRISPR-Cas9 genome editing to generate the *Zfp469*<sup>BCS</sup> line.

| Name                   | Sequence 5' - 3'                                                                                                                                                                                                  |
|------------------------|-------------------------------------------------------------------------------------------------------------------------------------------------------------------------------------------------------------------|
| gRNA1                  | TTGAAGGCATCCTCAGCCCCTGG                                                                                                                                                                                           |
| gRNA2                  | CTCCACAAGAGCCCCTCACTGG                                                                                                                                                                                            |
| <b>gRNA1</b>           | <b>TTGAAGGCATCCTCAGCCCCTGG</b>                                                                                                                                                                                    |
| <b>gRNA3</b>           | <b>TCCCACAAGAGCCCCTCACTGGG</b>                                                                                                                                                                                    |
| gRNA4                  | AGGGAAGGCTTTGGCTGTCTCGG                                                                                                                                                                                           |
| gRNA5                  | TGAGGATGCCTTCAAGAGCCAGG                                                                                                                                                                                           |
| Repair template        | CCACACGCTATCAATCCGAGACAGCCAAAGCCTTCCCTCTCCCCACAGAGGGACCA<br>GGCAAACCGATTCCGAACCCGCTGCTGGGCCTGGATAGCACCGGCAAACCGATTCC<br>GAACCCGCTGCTGGGCCTGGATAGCACCTGAGtGCAGAGACGGGTTGAAGGGCTT<br>TCCTCCAGAGCCACCACCTCCACCGCCACC |
| mZNF469g1 T7<br>primer | TGTAATACGACTCACTATAGGtgaaggcatcctcagcccc                                                                                                                                                                          |
| mZNF469g3 T7<br>primer | TGTAATACGACTCACTATAGGtcccacaagagcccctcact                                                                                                                                                                         |
| Universal reverse      | AAAAGCACCGACTCGGTGCC                                                                                                                                                                                              |
