# Supplementary material for: A Mouse Model of Brittle Cornea Syndrome caused by mutation in Zfp469
Source: bioRxiv or medRxiv preprint supplement (doi:10.1101/2021.07.08.451591), 2021-07-09
Supplement: Supplementary file [file media-3.pdf]

**Table S2. Loss of function mutation of Zfp469 is transmitted in the expected ratio in litters born from heterozygote x heterozygote crosses.**

|               | +/+ (N) | +/BCS (N) | BCS/BCS (N) | Total (N) |
|---------------|---------|-----------|-------------|-----------|
| <b>Male</b>   | 8       | 13        | 5           | 26        |
| <b>Female</b> | 11      | 23        | 10          | 44        |
| <b>Obs</b>    | 19      | 36        | 15          | 70        |
| <b>Exp</b>    | 17.5    | 35        | 17.5        |           |

Genotypes of offspring obtained in 10 litters from heterozygote x heterozygote crosses for the *Zfp469*<sup>BCS</sup> line were subject to Chi2 test, with no significant difference in genotype frequency between observed and expected numbers (N) (two-tailed p value = 0.3787).
